# Supplementary material for: Predictors of Recurrent Use of Psychiatric Emergency Services
Source: Atypon-hosted journal article supplement (doi:10.1176/appi.ps.201400097), 2015-02-02

**Figure 1: Follow-up of patients visiting psychiatric emergency services at least 3 times over 4 years**

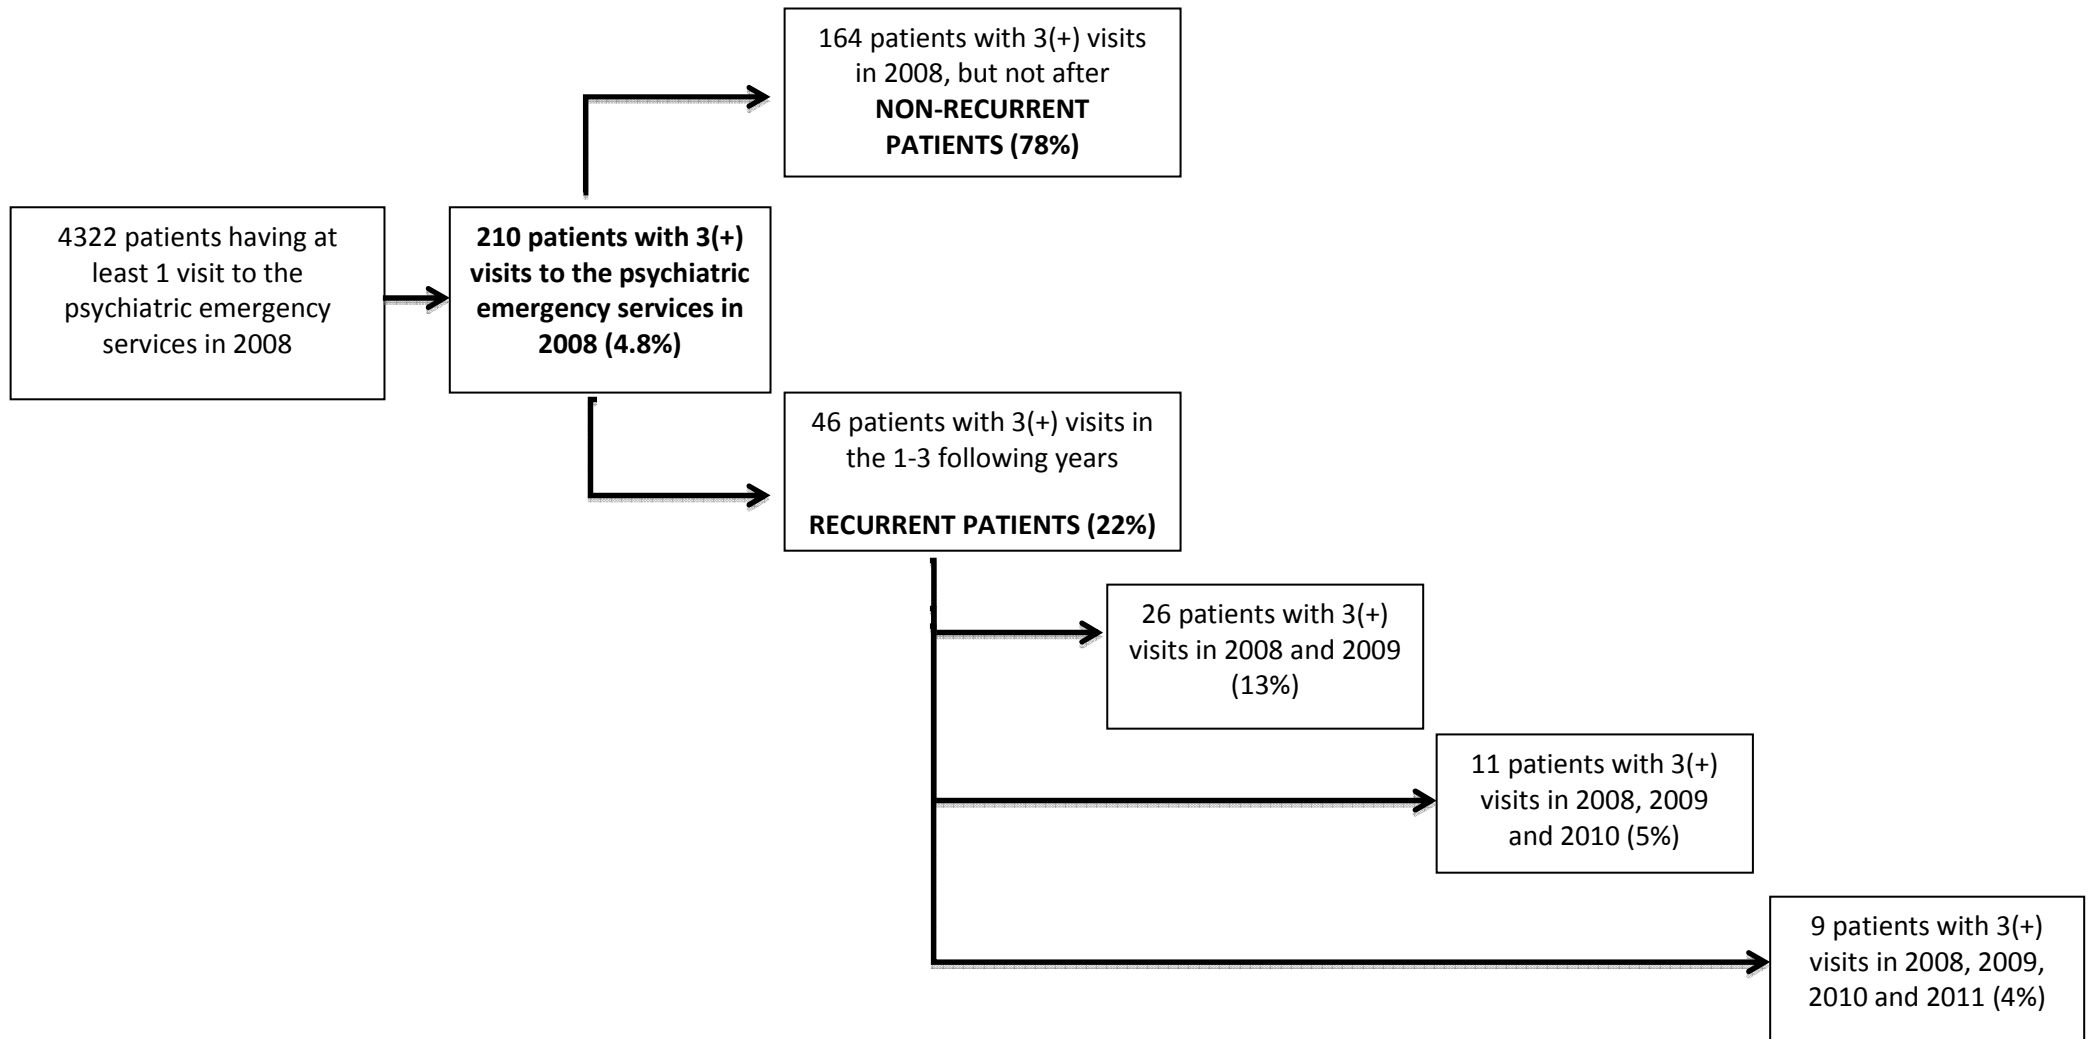

Supplement: appi.ps.201400097.ds001.pdf [file appi.ps.201400097.ds001.pdf]
